# Supplementary material
Source: PubMed Central journal article supplement (PMC2393771)

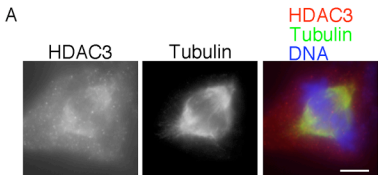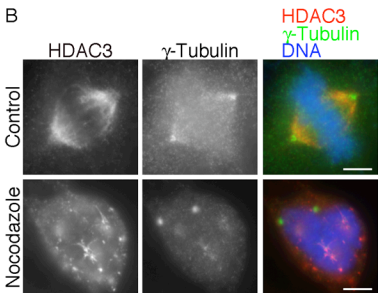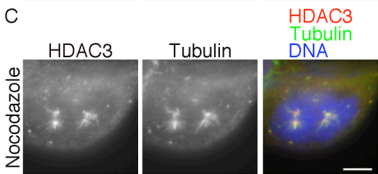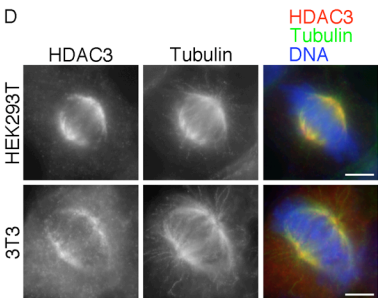

Supplement: pnas_0710140105_1.pdf [file pnas_0710140105_1.pdf]

A

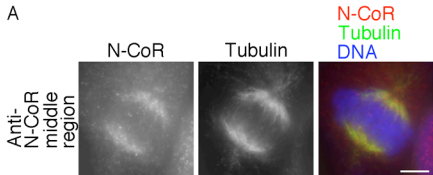

B

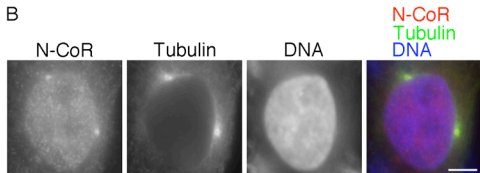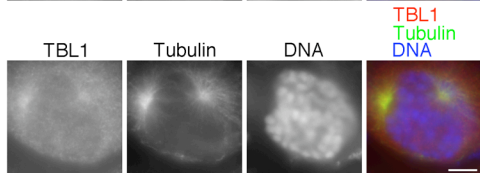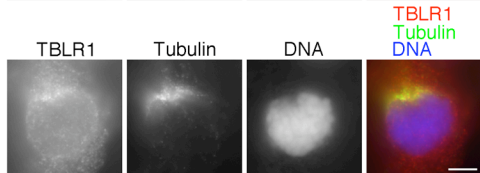

Supplement: pnas_0710140105_2.pdf [file pnas_0710140105_2.pdf]

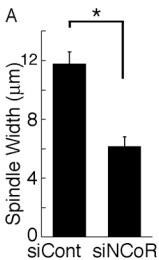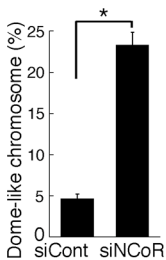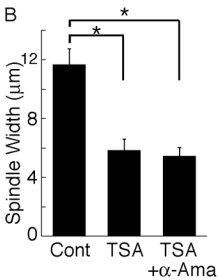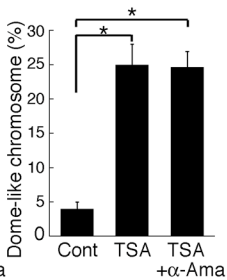

Supplement: pnas_0710140105_3.pdf [file pnas_0710140105_3.pdf]

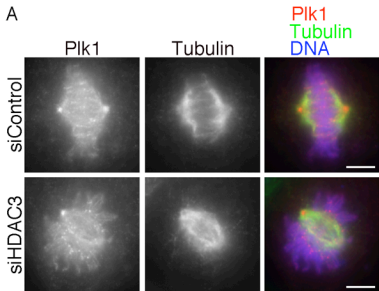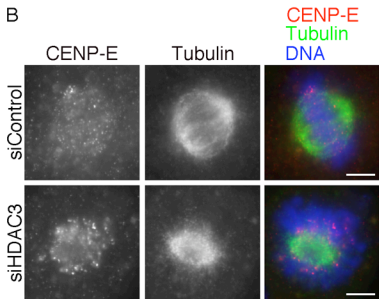

Supplement: pnas_0710140105_4.pdf [file pnas_0710140105_4.pdf]
